# Supplementary material for: Human islets contain four distinct subtypes of β cells
Source: PubMed Central journal article supplement (PMC4942571; doi:10.1038/ncomms11756), 2016-07-11
Supplement: ncomms11756-s1.pdf [file ncomms11756-s1.pdf]

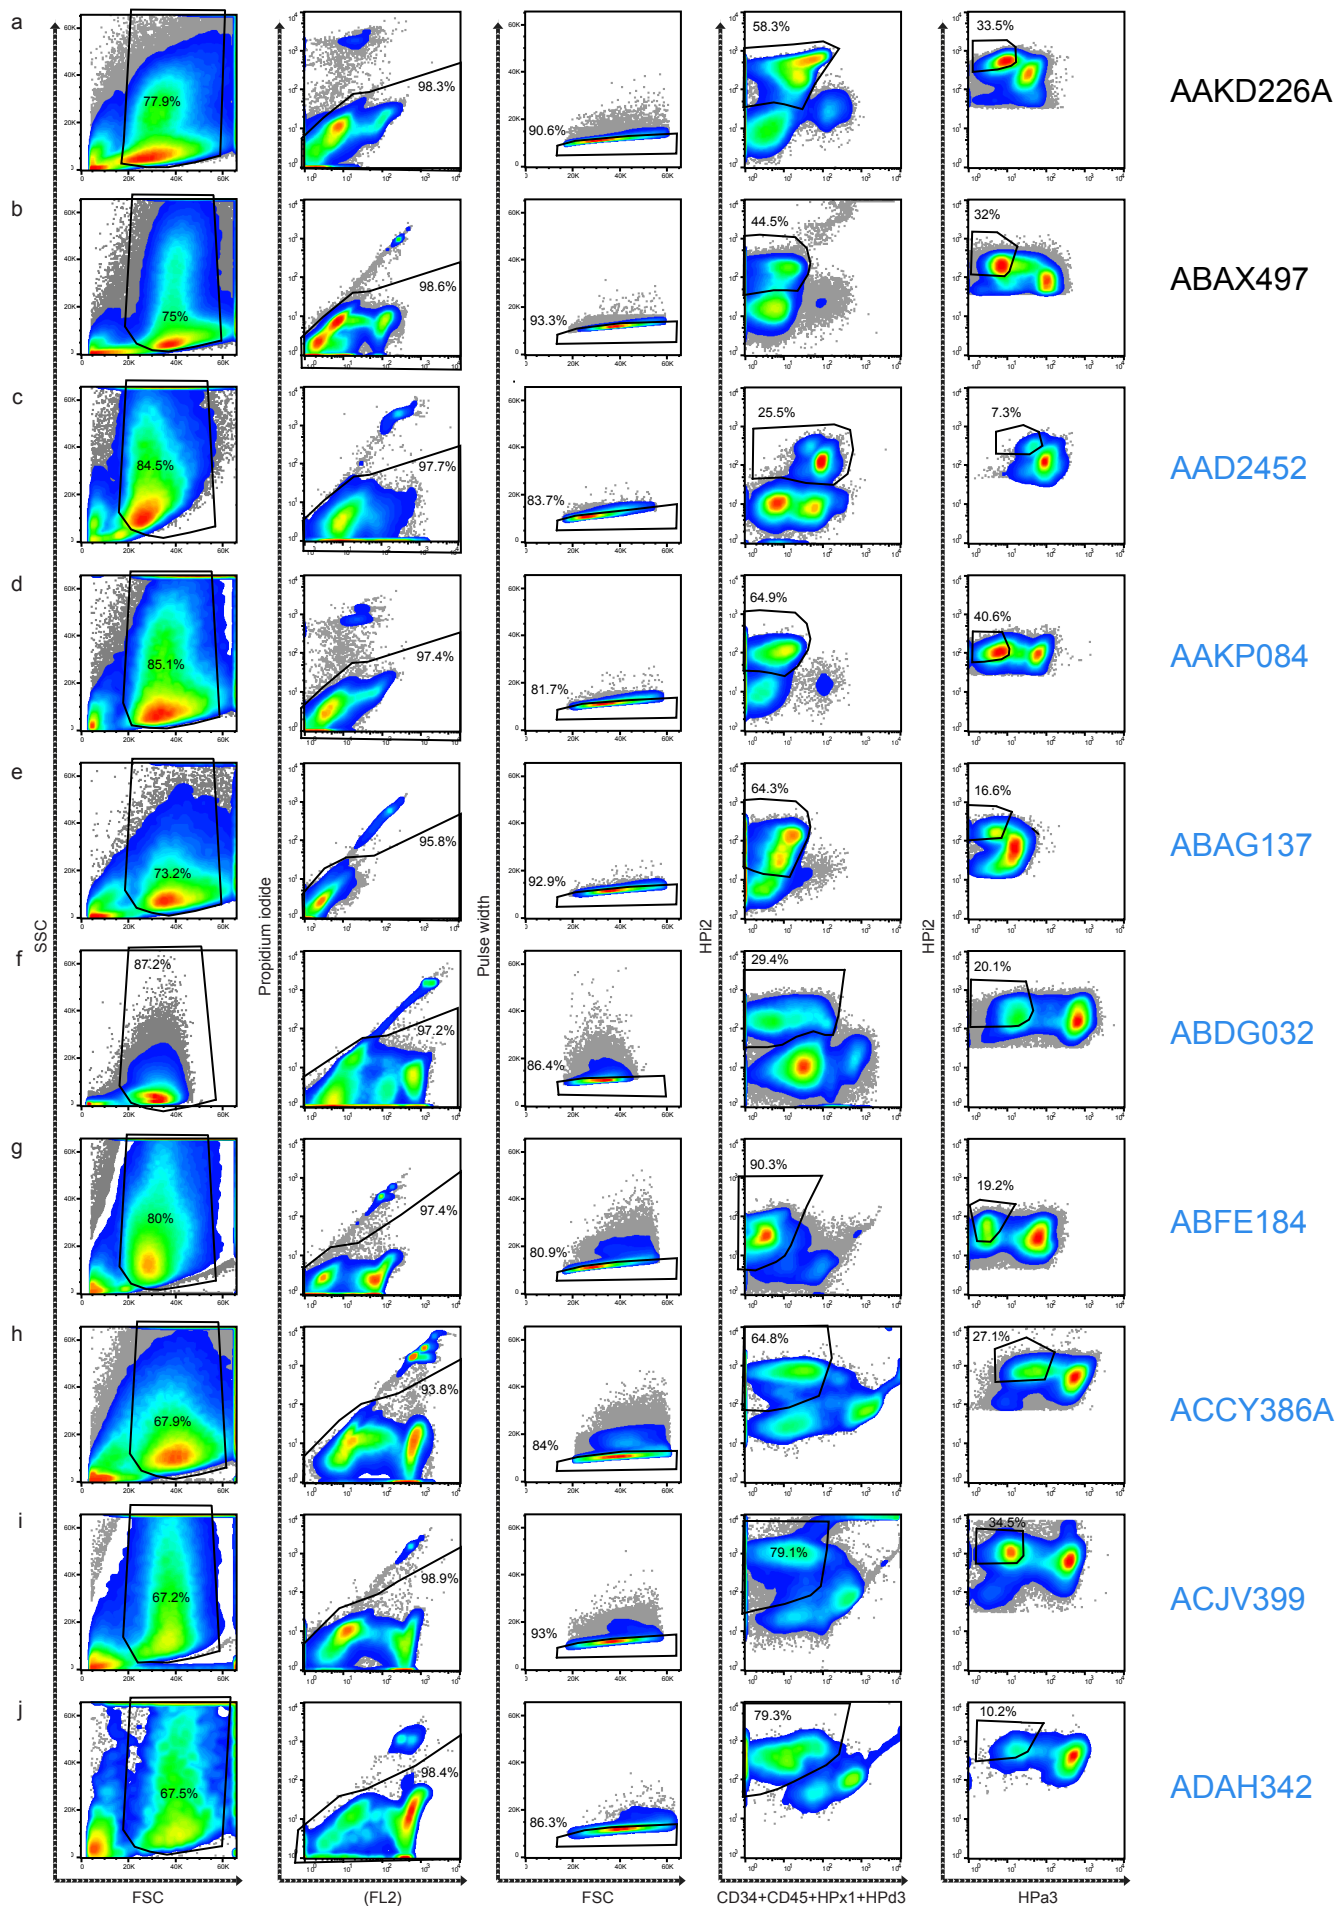

**Supplementary Figure 1 – Isolation of  $\beta$  cells from healthy and T2D islets by FACS.** Human islet samples were enzymatically dispersed and antibody labeled for flow cytometric analysis. For each islet specimen (a-j), sequential gating was used to exclude non-cell events (subpanel 1), dead cells (subpanel 2), doublets and larger cell clusters (subpanel 3), hematopoietic / endothelial / acinar / duct cells (subpanel 4), and to specifically select the  $\beta$  cell population (subpanel 5). SSC = Side Scatter; FSC = Forward Scatter; CD34, CD45; HPx1 (acinar), HPd3 (duct), HPa3 ( $\alpha / \delta / \epsilon$ ) and HPi2 (islet) are lineage-specific cell surface marking antibodies.

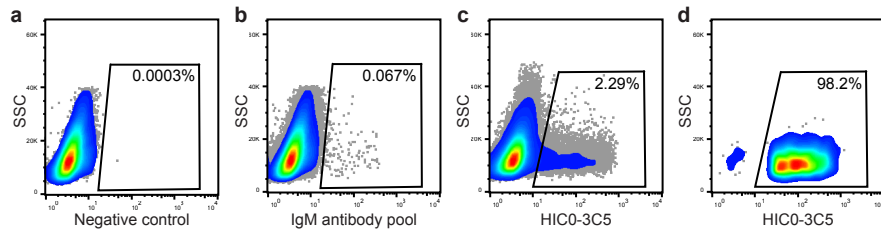

**Supplementary Figure 2 – Flow cytometric screening of a cDNA library for antigen identification.**

C6 rat insulinoma cells were transduced with a human lentiviral cDNA library (ORFeome 5.1) and screened for reactivity against novel human monoclonal antibodies. (a,b) A pool of eight mouse IgM antibodies were exposed to library-containing C6 cells; a small fraction of cells (0.067%) were reactive. After expansion in cell culture, a 2.3% of these were found to be specifically reactive for HIC0-3C5 (c) and these were purified for insert sequencing (d).

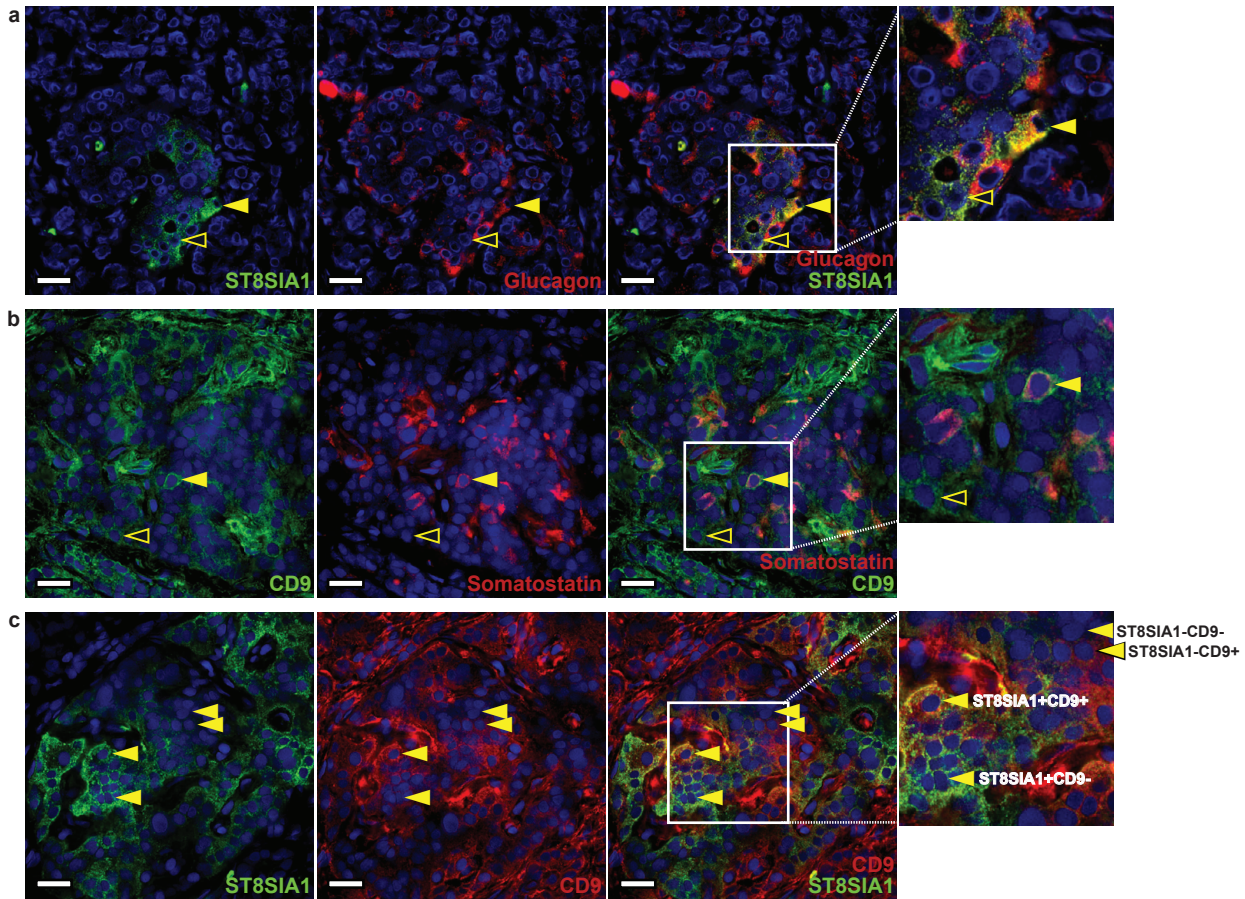

**Supplementary Figure 3 – Subset marker expression on non-β endocrine cells.** (a) Human pancreas co-labeled with antibodies recognizing ST8SIA1 and glucagon. ST8SIA1+ cells are mixture of glucagon+ alpha cells (solid arrows) and glucagon- β cells (hollow arrows). (b) Tissue co-labeled with antibodies recognizing CD9 and somatostatin. CD9+ cells are often somatostatin+ delta cells (solid arrows) but many are somatostatin- (hollow arrows). (c) Dual labeling of CD9 and ST8SIA1 reveals cells marked with neither, one, or both markers. Examples of each are indicated with arrows. Scale bar: 25 μm

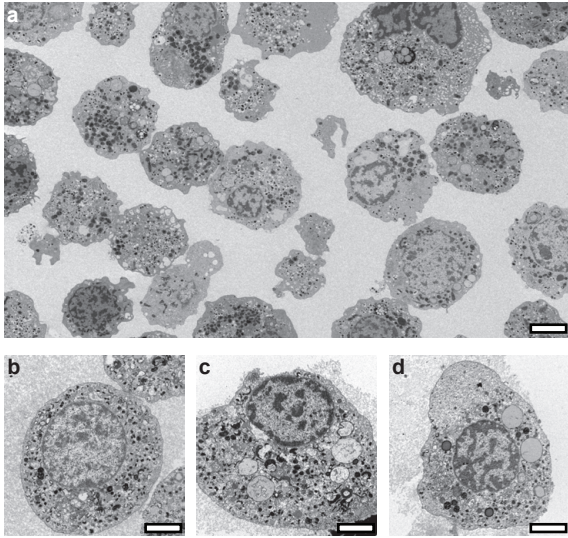

**Supplementary Figure 4 – Ultrastructure of FACS-sorted human  $\beta$  cell populations reveal insulin granulation and comparable cell morphology.** FACS-sorted  $\beta$ 1 (a,b),  $\beta$ 2 (c), and  $\beta$ 3 (d) cells were fixed and stained en bloc with 1% uranyl acetate. Individual 60 nm sections were imaged by transmission electron microscopy and recorded with an Advanced Microscopy Techniques camera. Original magnifications: 890x (a) and 7100x (b-d). Scale bars: 15  $\mu$ m (a) and 2  $\mu$ m (b-d).



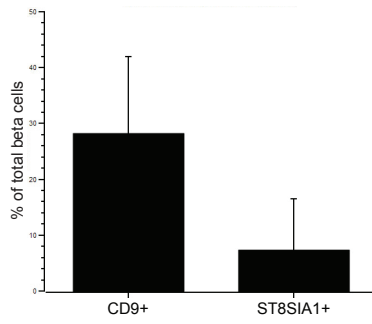

**Supplementary Figure 5 – Quantification of  $\beta$  cell subset marker expression in pancreatic tissue.**

The graph illustrates the percentages of proinsulin+ islet cells expressing either CD9 or ST8SIA1 determined by visually scoring cells in a total of 100 tissue-resident islets. Tissue sections were prepared from cryopreserved blocks of two different human pancreata, with 50 islets scored from each.

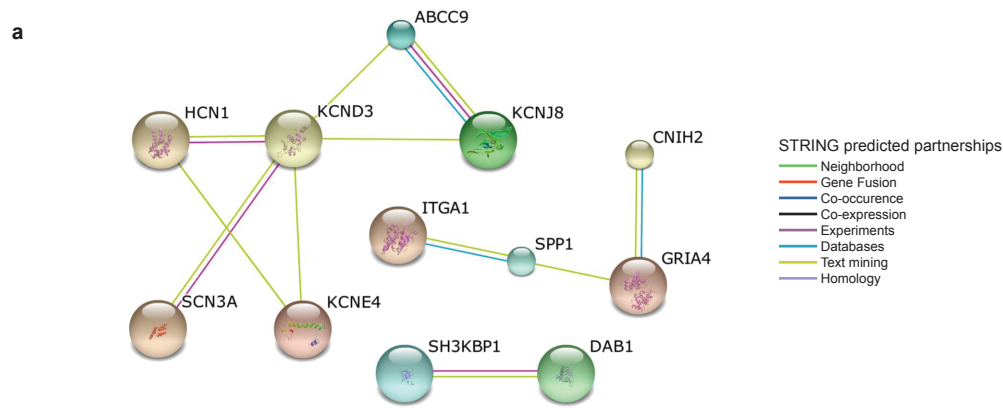

**b Genes significantly enriched in ST8SIA1+ beta cells (vs. ST8SIA1-)**

| Gene            | Transcript                                                                        | FC (ST8SIA1+ / ST8SIA1-) | CPM   | LR    | p value | FDR     |      |
|-----------------|-----------------------------------------------------------------------------------|--------------------------|-------|-------|---------|---------|------|
| ST8SIA1         | ST8 alpha-N-acetyl-neuraminide alpha-2,8-sialyltransferase 1                      | NM_003034                | 12.52 | 1.6   | 42.48   | 7.1E-11 | 0    |
| ATP8A2          | ATPase, Aminophospholipid Transporter, Class I, Type 8A, Member 2                 | NM_016529                | 3.92  | 1.9   | 14.28   | 1.6E-04 | 0.03 |
| HCN1            | Hyperpolarization activated cyclic nucleotide-gated potassium channel 1           | NM_021072                | 3.03  | 2.4   | 14.38   | 1.5E-04 | 0.03 |
| TSPAN18         | Tetraspanin 18                                                                    | NM_130783                | 2.8   | 2.7   | 13.89   | 1.9E-04 | 0.03 |
| CHD5            | Chromodomain Helicase DNA Binding Protein 5                                       | NM_015557                | 2.6   | 2.7   | 10.53   | 1.2E-03 | 0.09 |
| OPCML           | Opioid Binding Protein/Cell Adhesion Molecule-Like                                | NM_001012393             | 2.45  | 7.4   | 22.25   | 2.4E-06 | 0    |
| DAB1            | Dab, Reelin Signal Transducer, Homolog 1 (Drosophila)                             | NM_021080                | 2.21  | 10.7  | 17.47   | 2.9E-05 | 0.01 |
| SMOC1           | SPARC Related Modular Calcium Binding 1                                           | NM_022137                | 2.2   | 4.9   | 11.43   | 7.2E-04 | 0.07 |
| KCND3           | Potassium Channel, Voltage Gated Shal Related Subfamily D, Member 3               | NM_004980                | 2.16  | 9.9   | 33.33   | 7.8E-09 | 0    |
| PLCL1           | Phospholipase C-Like 1                                                            | NM_006226                | 2.09  | 5.5   | 11.98   | 5.4E-04 | 0.06 |
| TMEM159         | Transmembrane Protein 159                                                         | NM_020422                | 2.07  | 6.7   | 11.71   | 6.2E-04 | 0.06 |
| PCDH10          | Protocadherin 10                                                                  | NM_032961                | 2.06  | 6.0   | 16.29   | 5.4E-05 | 0.02 |
| SIX3            | SIX Homeobox 3                                                                    | NM_005413                | 2.01  | 12.6  | 36.13   | 1.9E-09 | 0    |
| ATP8B1          | ATPase, Aminophospholipid Transporter, Class I, Type 8B, Member 1                 | NM_005603                | 1.98  | 7.3   | 12.43   | 4.2E-04 | 0.05 |
| C1orf175/HEATR8 | Chromosome 1 open reading frame 175                                               | NM_001039464             | 1.94  | 4.9   | 14.64   | 1.3E-04 | 0.02 |
| CORO2B          | Coronin, Actin Binding Protein, 2B                                                | NM_001190457             | 1.9   | 9.7   | 15.66   | 7.6E-05 | 0.02 |
| KCNJ8           | Potassium Channel, Inwardly Rectifying Subfamily J, Member 8                      | NM_004982                | 1.9   | 12.6  | 11.55   | 6.8E-04 | 0.07 |
| SPP1            | Secreted Phosphoprotein 1                                                         | NM_001040058             | 1.87  | 59.7  | 34.3    | 4.7E-09 | 0    |
| GAP43           | Growth Associated Protein 43                                                      | NM_001130064             | 1.84  | 15.9  | 10.48   | 1.2E-03 | 0.09 |
| CDR2L           | Cerebellar Degeneration-Related Protein 2-Like                                    | NM_014603                | 1.83  | 4.6   | 11.1    | 8.7E-04 | 0.08 |
| TFF3            | Trefoil Factor 3 (Intestinal)                                                     | NM_003226                | 1.81  | 33.5  | 51.21   | 8.3E-13 | 0    |
| MUC12           | Mucin 12, Cell Surface Associated                                                 | NM_001164462             | 1.79  | 5.6   | 11.95   | 5.5E-04 | 0.06 |
| OXR1            | Oxidation Resistance 1                                                            | NM_018002                | 1.76  | 16.3  | 16.82   | 4.1E-05 | 0.01 |
| ITGA1           | Integrin, Alpha 1                                                                 | NM_181501                | 1.76  | 11.7  | 13.54   | 2.3E-04 | 0.04 |
| KIRREL3         | Kin Of IRRE Like 3 (Drosophila)                                                   | NM_032531                | 1.76  | 7.7   | 13.2    | 2.8E-04 | 0.04 |
| KCNE4           | Potassium Channel, Voltage Gated Subfamily E Regulatory Beta Subunit 4            | NM_080671                | 1.76  | 22.3  | 11.66   | 6.4E-04 | 0.06 |
| TP53H1          | Tumor Protein P53 Inducible Protein 11                                            | NM_006034                | 1.75  | 16.4  | 33.3    | 7.9E-09 | 0    |
| CREB3L1         | CAMP Responsive Element Binding Protein 3-Like 1                                  | NM_052854                | 1.71  | 5.2   | 10.62   | 1.1E-03 | 0.09 |
| CNIH2           | Cornichon Family AMPA Receptor Auxiliary Protein 2                                | NM_182553                | 1.63  | 13.2  | 18.89   | 1.4E-05 | 0.01 |
| KIAA1644        | KIAA1644                                                                          | NM_001099294             | 1.59  | 77.7  | 27.74   | 1.4E-07 | 0    |
| BCKDHA          | Branched Chain Keto Acid Dehydrogenase E1, Alpha Polypeptide                      | NM_000709                | 1.58  | 9.3   | 10.22   | 1.4E-03 | 0.1  |
| RBM43           | RNA Binding Motif Protein 43                                                      | NM_198557                | 1.57  | 15.2  | 12.78   | 3.5E-04 | 0.04 |
| SCN3A           | Sodium Channel, Voltage Gated, Type III Alpha Subunit                             | NM_006922                | 1.57  | 14.5  | 11.4    | 7.3E-04 | 0.07 |
| TMEM130         | Transmembrane Protein 130                                                         | NM_001134450             | 1.55  | 19.2  | 11.92   | 5.6E-04 | 0.06 |
| ABCC9           | ATP-Binding Cassette, Sub-Family C (CFTR/MRP), Member 9                           | NM_020297                | 1.54  | 75.5  | 17.32   | 3.2E-05 | 0.01 |
| GPX3            | Glutathione Peroxidase 3                                                          | NM_002084                | 1.53  | 369.1 | 27.28   | 1.8E-07 | 0    |
| MTUS1           | Microtubule Associated Tumor Suppressor 1                                         | NM_001001925             | 1.53  | 50.8  | 23.3    | 1.4E-06 | 0    |
| ODZ4            | odz, odd Oz/ten-m homolog 4 (Drosophila)                                          | NM_001098816             | 1.52  | 16.8  | 14.7    | 1.3E-04 | 0.02 |
| SULF2           | Sulfatase 2                                                                       | NM_198596                | 1.49  | 58.5  | 17.97   | 2.2E-05 | 0.01 |
| SH3KBP1         | SH3-Domain Kinase Binding Protein 1                                               | NM_001024666             | 1.49  | 16.5  | 10.77   | 1.0E-03 | 0.09 |
| DFNB31          | Deafness, Autosomal Recessive 31                                                  | NM_001083885             | 1.44  | 18.3  | 17.11   | 3.5E-05 | 0.01 |
| C13orf15        | Chromosome 13 Open Reading Frame 15                                               | NM_014059                | 1.44  | 99.5  | 13.19   | 2.8E-04 | 0.04 |
| PON3            | Paraoxonase 3                                                                     | NM_000940                | 1.43  | 23.0  | 12      | 5.3E-04 | 0.06 |
| MYOM1           | Myomesin 1                                                                        | NM_003803                | 1.42  | 32.7  | 12.24   | 4.7E-04 | 0.05 |
| GSN             | Gelsolin                                                                          | NM_001127664             | 1.4   | 832.4 | 20.12   | 7.3E-06 | 0    |
| NEFM            | Neurofilament, Medium Polypeptide                                                 | NM_005382                | 1.4   | 130.7 | 19.67   | 9.2E-06 | 0    |
| C1orf127        | Chromosome 1 Open Reading Frame 127                                               | NM_001170754             | 1.38  | 23.2  | 13.25   | 2.7E-04 | 0.04 |
| PLD3            | Phospholipase D Family, Member 3                                                  | NM_001031696             | 1.37  | 72.0  | 21.61   | 3.3E-06 | 0    |
| NAGLU           | N-Acetylglucosaminidase, Alpha                                                    | NM_000263                | 1.37  | 20.3  | 12.05   | 5.2E-04 | 0.06 |
| GRIA4           | Glutamate Receptor, Ionotropic, AMPA 4                                            | NM_000829                | 1.37  | 42.2  | 11.58   | 6.7E-04 | 0.06 |
| CITED2          | Cbp/P300-Interacting Transactivator, With Glu/Asp-Rich Carboxy-Terminal Domain, 2 | NM_006079                | 1.35  | 77.4  | 24.21   | 8.7E-07 | 0    |
| PDK4            | Pyruvate Dehydrogenase Kinase, Isozyme 4                                          | NM_002612                | 1.33  | 138.1 | 18.16   | 2.0E-05 | 0.01 |
| C17orf28        | Chromosome 17 Open reading Frame 28                                               | NM_030630                | 1.33  | 178.1 | 11.68   | 6.3E-04 | 0.06 |

**Supplementary Figure 6 – Genes with significantly enriched expression in ST8SIA1+  $\beta$  cells.** Transcripts with significantly ( $FDR \leq 0.1$ ,  $p \leq 0.001$ ) elevated expression in ST8SIA1+  $\beta$  cells compared to ST8SIA1-  $\beta$  cells and a fold change of at least 1.33x were identified. (a) Relationship networks between these genes predicted by STRING. (b) The list of 53 genes meeting these criteria; 11 genes were omitted due to low expression level or high probability of association with a contaminating population.

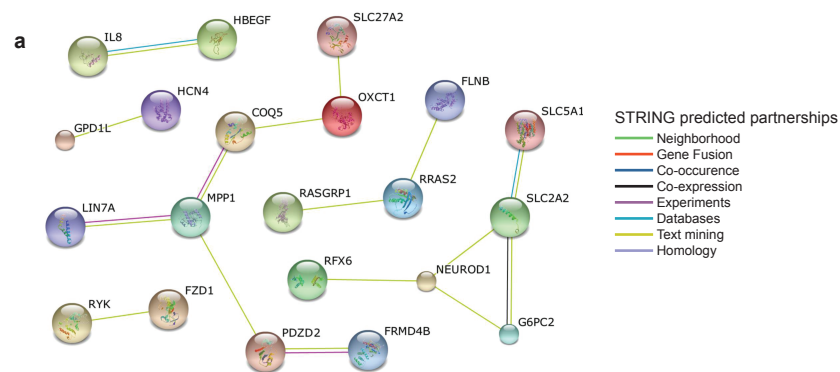

**b Genes significantly enriched in beta ST8SIA1- cells (vs. ST8SIA1+)**

| Gene         | Transcript                                                              | FC (ST8SIA1+ / ST8SIA1-) | CPM   | LR    | p value | FDR     |      |
|--------------|-------------------------------------------------------------------------|--------------------------|-------|-------|---------|---------|------|
| FLNB         | Filamin B, Beta                                                         | NM_001164317             | -1.33 | 175.3 | 18.61   | 1.6E-05 | 0.01 |
| OXCT1        | 3-Oxoacid CoA Transferase 1                                             | NM_000436                | -1.33 | 35.9  | 17.58   | 2.8E-05 | 0.01 |
| TMCC3        | Transmembrane And Coiled-Coil Domain Family 3                           | NM_020698                | -1.33 | 59.4  | 15.52   | 8.2E-05 | 0.02 |
| IL17RB       | Interleukin 17 Receptor B                                               | NM_018725                | -1.33 | 65.8  | 13.2    | 2.8E-04 | 0.04 |
| LRRFIP1      | Leucine Rich Repeat (In FLII) Interacting Protein 1                     | NM_001137552             | -1.34 | 106.0 | 15.09   | 1.0E-04 | 0.02 |
| C12orf75     | Chromosome 12 Open Reading Frame 75                                     | NM_001145199             | -1.34 | 60.3  | 11.88   | 5.7E-04 | 0.06 |
| NEUROD1      | Neuronal Differentiation 1                                              | NM_002500                | -1.34 | 74.0  | 10.81   | 1.0E-03 | 0.09 |
| BNIP3        | BCL2/Adenovirus E1B 19kDa Interacting Protein 3                         | NM_004052                | -1.35 | 30.9  | 12.27   | 4.6E-04 | 0.05 |
| DIAPH2       | Diaphanous-Related Formin 2                                             | NM_006729                | -1.35 | 28.5  | 10.86   | 9.8E-04 | 0.08 |
| PSD3         | Pleckstrin And Sec7 Domain Containing 3                                 | NM_015310                | -1.36 | 146.9 | 18.93   | 1.4E-05 | 0.01 |
| PDHB         | Pyruvate Dehydrogenase (Lipoamide) Beta                                 | NM_000925                | -1.36 | 41.7  | 18.66   | 1.6E-05 | 0.01 |
| MPP1         | Membrane Protein, Palmitoylated 1, 55kDa                                | NM_001166462             | -1.36 | 33.8  | 16.01   | 6.3E-05 | 0.02 |
| FAM159B      | Family With Sequence Similarity 159, Member B                           | NM_001164442             | -1.36 | 44.6  | 15.9    | 6.7E-05 | 0.02 |
| NVL          | Nuclear VCP-Like                                                        | NM_206840                | -1.37 | 23.8  | 12.09   | 5.1E-04 | 0.06 |
| MAFB         | V-Maf Avian Musculoaponeurotic Fibrosarcoma Oncogene Homolog B          | NM_005461                | -1.38 | 61.9  | 14.5    | 1.4E-04 | 0.03 |
| SPTLC2       | Serine Palmitoyltransferase, Long Chain Base Subunit 2                  | NM_004863                | -1.38 | 45.3  | 13.64   | 2.2E-04 | 0.03 |
| GPD1L        | Glycerol-3-Phosphate Dehydrogenase 1-Like                               | NM_015141                | -1.38 | 22.3  | 13.33   | 2.6E-04 | 0.04 |
| TNFRSF21     | Tumor Necrosis Factor Receptor Superfamily, Member 21                   | NM_014452                | -1.39 | 470.6 | 25.48   | 4.5E-07 | 0    |
| DNAJB4       | DnaJ (Hsp40) Homolog, Subfamily B, Member 4                             | NM_007034                | -1.39 | 13.6  | 10.23   | 1.4E-03 | 0.1  |
| RASGRP1      | RAS Guanyl Releasing Protein 1 (Calcium And DAG-Regulated)              | NM_005739                | -1.4  | 26.7  | 10.43   | 1.2E-03 | 0.1  |
| VPS36        | Vacuolar Protein Sorting 36 Homolog (S. Cerevisiae)                     | NM_016075                | -1.41 | 24.3  | 11.89   | 5.6E-04 | 0.06 |
| HBEGF        | Heparin-Binding EGF-Like Growth Factor                                  | NM_001945                | -1.42 | 22.8  | 14.87   | 1.2E-04 | 0.02 |
| RYK          | Receptor-Like Tyrosine Kinase                                           | NM_001005861             | -1.42 | 17.3  | 10.54   | 1.2E-03 | 0.09 |
| RDH10        | Retinol Dehydrogenase 10 (All-Trans)                                    | NM_172037                | -1.43 | 43.6  | 10.9    | 9.6E-04 | 0.08 |
| PDZD2        | PDZ Domain Containing 2                                                 | NM_178140                | -1.44 | 33.9  | 15.77   | 7.1E-05 | 0.02 |
| G6PC2        | Glucose-6-Phosphatase, Catalytic, 2                                     | NM_021176                | -1.46 | 430.6 | 35.09   | 3.2E-09 | 0    |
| RFX6         | Regulatory Factor X, 6                                                  | NM_173560                | -1.46 | 56.7  | 24.12   | 9.0E-07 | 0    |
| GREM1        | Gremlin 1, DAN Family BMP Antagonist                                    | NM_001191323             | -1.46 | 54.8  | 22.3    | 2.3E-06 | 0    |
| DCBLD2       | Discoidin, CUB And LCCL Domain Containing 2                             | NM_080927                | -1.47 | 33.4  | 23.05   | 1.6E-06 | 0    |
| ATP11A       | ATPase, Class VI, Type 11A                                              | NM_015205                | -1.48 | 47.9  | 18.6    | 1.6E-05 | 0.01 |
| RRA52        | Related RAS Viral (R-Ras) Oncogene Homolog 2                            | NM_001177315             | -1.48 | 15.5  | 14.25   | 1.6E-04 | 0.03 |
| RALGFS2      | Ral GEF With PH Domain And SH3 Binding Motif 2                          | NM_152663                | -1.48 | 13.8  | 13.24   | 2.7E-04 | 0.04 |
| SCGB2A1      | Secretoglobin, Family 2A, Member 1                                      | NM_002407                | -1.49 | 145.8 | 33.06   | 8.9E-09 | 0    |
| C12orf76     | Chromosome 12 Open Reading Frame 76                                     | NM_207435                | -1.52 | 20.9  | 14.7    | 1.3E-04 | 0.02 |
| CASP2        | Caspase 2, Apoptosis-Related Cysteine Peptidase                         | NM_032982                | -1.52 | 28.5  | 14.7    | 1.3E-04 | 0.02 |
| CBR4         | Carbonyl Reductase 4                                                    | NM_032783                | -1.52 | 11.2  | 10.33   | 1.3E-03 | 0.1  |
| ZNF124       | Zinc Finger Protein 124                                                 | NM_003431                | -1.53 | 21.3  | 28.94   | 7.5E-08 | 0    |
| PALM2        | Paralemmin 2                                                            | NM_001037293             | -1.53 | 18.5  | 15.8    | 7.0E-05 | 0.02 |
| SLC2A2/GLUT2 | Solute Carrier Family 2 (Facilitated Glucose Transporter), Member 2     | NM_000340                | -1.53 | 14.8  | 15.76   | 7.2E-05 | 0.02 |
| MARK1        | MA/Microtubule Affinity-Regulating Kinase 1                             | NM_018650                | -1.54 | 82.7  | 16.89   | 4.0E-05 | 0.01 |
| CA5B         | Carbonic Anhydrase VB, Mitochondrial                                    | NM_007220                | -1.55 | 24.7  | 12.02   | 5.3E-04 | 0.06 |
| PANX1        | Pannexin 1                                                              | NM_015368                | -1.58 | 19.5  | 15.16   | 9.9E-05 | 0.02 |
| MARS2        | Methionyl-TRNA Synthetase 2, Mitochondrial                              | NM_138395                | -1.6  | 8.6   | 12.69   | 3.7E-04 | 0.05 |
| C6orf211     | Chromosome 6 Open Reading Frame 211                                     | NM_024573                | -1.61 | 14.2  | 24.51   | 7.4E-07 | 0    |
| MT1X         | Metallothionein 1X                                                      | NM_005952                | -1.62 | 120.5 | 16.25   | 5.6E-05 | 0.02 |
| SLFN5        | Schlafen Family Member 5                                                | NM_144975                | -1.62 | 15.1  | 11.16   | 8.4E-04 | 0.08 |
| FRMD4B       | FERM Domain Containing 4B                                               | NM_015123                | -1.63 | 7.5   | 11.74   | 6.1E-04 | 0.06 |
| LNP1         | Leukemia NUP98 Fusion Partner 1                                         | NM_001085451             | -1.63 | 6.1   | 10.38   | 1.3E-03 | 0.1  |
| MT2A         | Metallothionein 2A                                                      | NM_005953                | -1.65 | 87.1  | 23.43   | 1.3E-06 | 0    |
| PXK          | PX Domain Containing Serine/Threonine Kinase                            | NM_017771                | -1.65 | 19.3  | 15.86   | 6.8E-05 | 0.02 |
| DCLRE1B      | DNA Cross-Link Repair 1B                                                | NM_022836                | -1.65 | 7.9   | 10.67   | 1.1E-03 | 0.09 |
| ZNF681       | Zinc Finger Protein 681                                                 | NM_138286                | -1.68 | 6.0   | 14.79   | 1.2E-04 | 0.02 |
| HCN4         | Hyperpolarization Activated Cyclic Nucleotide Gated Potassium Channel 4 | NM_005477                | -1.77 | 13.8  | 10.95   | 9.4E-04 | 0.08 |
| AHNAK        | AHNAK Nucleoprotein                                                     | NM_001620                | -1.79 | 27.1  | 12.11   | 5.0E-04 | 0.06 |
| TCEA3        | Transcription Elongation Factor A (SII), 3                              | NM_003196                | -1.85 | 8.5   | 11.42   | 7.3E-04 | 0.07 |
| SLC27A2      | Solute Carrier Family 27 (Fatty Acid Transporter), Member 2             | NM_001159629             | -1.86 | 5.3   | 16.64   | 4.5E-05 | 0.01 |
| SLC39A11     | Solute Carrier Family 39, Member 11                                     | NM_001159770             | -1.86 | 5.0   | 12.15   | 4.9E-04 | 0.06 |
| PPARD        | Peroxisome Proliferator-Activated Receptor Delta                        | NM_006238                | -1.87 | 10.1  | 19.16   | 1.2E-05 | 0.01 |
| COQ5         | Coenzyme Q5 Homolog, Methyltransferase (S. Cerevisiae)                  | NM_032314                | -1.89 | 9.4   | 21.33   | 3.9E-06 | 0    |
| HS6ST2       | Heparan Sulfate 6-O-Sulfotransferase 2                                  | NM_001077188             | -1.91 | 9.4   | 12.48   | 4.1E-04 | 0.05 |
| DISP1        | Dispatched Homolog 1 (Drosophila)                                       | NM_032890                | -1.96 | 14.0  | 13.27   | 2.7E-04 | 0.04 |
| APCDD1L      | Adenomatosis Polyposis Coli Down-Regulated 1-Like                       | NM_153360                | -2.03 | 12.0  | 27.79   | 1.4E-07 | 0    |
| NFX          | Nuclear Factor I/X (CCAAT-Binding Transcription Factor)                 | NM_002501                | -2.04 | 12.8  | 40.47   | 2.0E-10 | 0    |
| SLC5A1       | Solute Carrier Family 5 (Sodium/Glucose Cotransporter), Member 1        | NM_000343                | -2.09 | 13.8  | 12.96   | 3.2E-04 | 0.04 |
| MYCL1        | L-myc-1 proto-oncogene protein                                          | NM_001033081             | -2.15 | 3.3   | 10.77   | 1.0E-03 | 0.09 |
| AFAP1        | Actin Filament Associated Protein 1                                     | NM_001134647             | -2.16 | 4.4   | 21      | 4.6E-06 | 0    |
| DUSP19       | Dual Specificity Phosphatase 19                                         | NM_080876                | -2.21 | 4.5   | 14.68   | 1.3E-04 | 0.02 |
| FZD1         | Frizzled Class Receptor 1                                               | NM_003505                | -2.25 | 9.1   | 23.87   | 1.0E-06 | 0    |
| PFIFBP2      | PTPRF Interacting Protein, Binding Protein 2 (Liprin Beta 2)            | NM_003621                | -2.33 | 6.3   | 17.67   | 2.6E-05 | 0.01 |
| IL8          | Interleukin 8                                                           | NM_000584                | -2.38 | 33.4  | 15.97   | 6.4E-05 | 0.02 |
| LIN7A        | Lin-7 Homolog A (C. Elegans)                                            | NM_004664                | -3.27 | 1.9   | 10.46   | 1.2E-03 | 0.09 |
| PCDH20       | Protocadherin 20                                                        | NM_022843                | -3.48 | 4.1   | 20.92   | 4.8E-06 | 0    |

**Supplementary Figure 7 - Genes with significantly enriched expression in ST8SIA1-β cells.** Transcripts with significantly (FDR≤0.1, p≤0.001) elevated expression in ST8SIA1-β cells compared to ST8SIA1+β cells and a fold change of at least 1.33x were identified. (a) Relationship networks between these genes predicted by STRING. (b) The list of 71 genes meeting these criteria; 30 genes were omitted due to low expression level or high probability of association with a contaminating population.

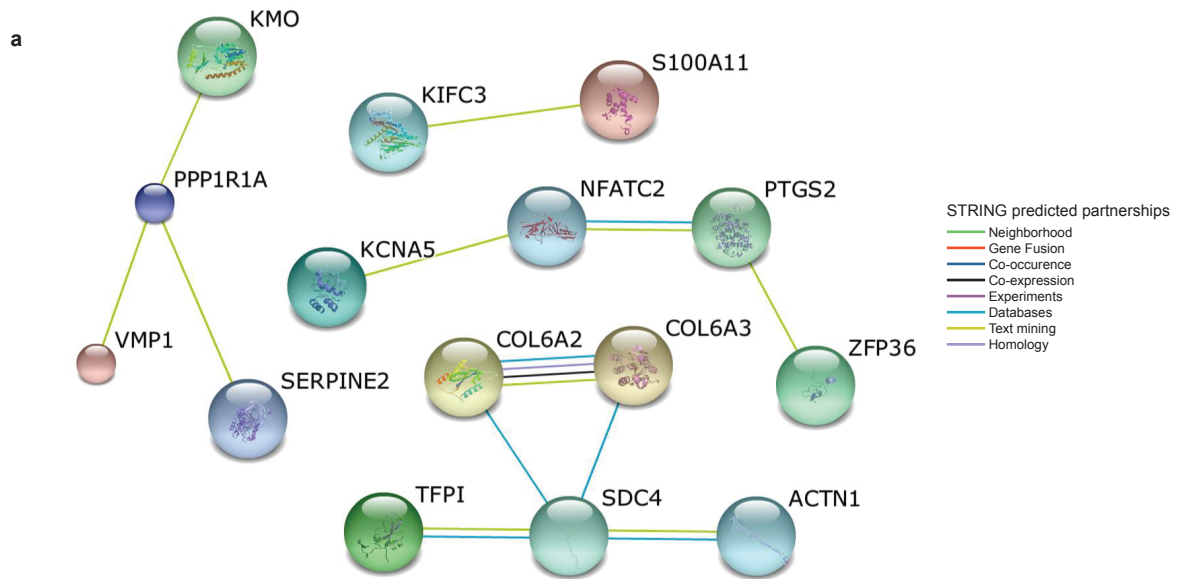

**b**

**Genes significantly enriched in beta CD9+ cells (vs. CD9-)**

| Gene       |                                                                                                       | Transcript   | FC (CD9+ / CD9-) | CPM   | LR    | p value | FDR  |
|------------|-------------------------------------------------------------------------------------------------------|--------------|------------------|-------|-------|---------|------|
| LAPTM5     | Lysosomal Protein Transmembrane 5                                                                     | NM_006762    | 32.98            | 1.8   | 29.49 | 5.6E-08 | 0    |
| IL1RN      | Interleukin 1 Receptor Antagonist                                                                     | NM_173843    | 28.65            | 1.3   | 18    | 2.2E-05 | 0.01 |
| CD9        | CD9 Molecule                                                                                          | NM_001769    | 9.12             | 29.2  | 163.9 | 1.6E-37 | 0    |
| PRDM1      | PR Domain Containing 1, With ZNF Domain                                                               | NM_001198    | 7.53             | 1.9   | 17.81 | 2.4E-05 | 0.01 |
| TACSTD2    | Tumor-Associated Calcium Signal Transducer 2                                                          | NM_002353    | 6.15             | 2.2   | 11.78 | 6.0E-04 | 0.08 |
| COL6A3     | Collagen, Type VI, Alpha 3                                                                            | NM_057167    | 5.97             | 1.2   | 10.77 | 1.0E-03 | 0.1  |
| COL6A2     | Collagen, Type VI, Alpha 2                                                                            | NM_058175    | 4.76             | -1.1  | 11.95 | 5.5E-04 | 0.07 |
| SLC44A4    | Solute Carrier Family 44, Member 4                                                                    | NM_001178044 | 3.59             | 2.0   | 16.57 | 4.7E-05 | 0.01 |
| CD74       | CD74 Molecule, Major Histocompatibility Complex, Class II Invariant Chain                             | NM_001025159 | 2.81             | 3.8   | 13.8  | 2.0E-04 | 0.04 |
| BMP2       | Bone Morphogenetic Protein 2                                                                          | NM_001200    | 2.56             | 4.0   | 11.31 | 7.7E-04 | 0.09 |
| PMEPA1     | Prostate Transmembrane Protein, Androgen Induced 1                                                    | NM_199169    | 2.26             | 3.9   | 15.13 | 1.0E-04 | 0.02 |
| TSPAN33    | Tetraspanin 33                                                                                        | NM_178562    | 2.21             | 11.5  | 11.98 | 5.4E-04 | 0.07 |
| KMO        | Kynurenine 3-Monooxygenase (Kynurenine 3-Hydroxylase)                                                 | NM_003679    | 2.12             | 3.3   | 12.64 | 3.8E-04 | 0.06 |
| MIA2       | Melanoma Inhibitory Activity 2                                                                        | NM_054024    | 2.12             | 22.8  | 11.34 | 7.6E-04 | 0.09 |
| TFPI       | Tissue Factor Pathway Inhibitor (Lipoprotein-Associated Coagulation Inhibitor)                        | NM_006287    | 2.11             | 4.7   | 12.27 | 4.6E-04 | 0.07 |
| NPC1L1     | NPC1-Like 1                                                                                           | NM_001101648 | 2.1              | 40.5  | 32.8  | 1.0E-08 | 0    |
| SYNM       | Synemin, Intermediate Filament Protein                                                                | NM_145728    | 2.1              | 12.9  | 14.27 | 1.6E-04 | 0.03 |
| SDC4       | Syndecan 4                                                                                            | NM_002999    | 2.06             | 15.1  | 22.43 | 2.2E-06 | 0    |
| KCNA5      | Potassium Channel, Voltage Gated Shaker Related Subfamily A, Member 5                                 | NM_002234    | 2.04             | 9.9   | 18.78 | 1.5E-05 | 0.01 |
| RBP4       | Retinol Binding Protein 4, Plasma                                                                     | NM_006744    | 1.93             | 139.4 | 16.62 | 4.6E-05 | 0.01 |
| TMED6      | Transmembrane Emp24 Protein Transport Domain Containing 6                                             | NM_144676    | 1.92             | 34.8  | 17.42 | 3.0E-05 | 0.01 |
| KIFC3      | Kinesin Family Member C3                                                                              | NM_005550    | 1.9              | 10.7  | 11.14 | 8.4E-04 | 0.09 |
| PTGS2/COX2 | Prostaglandin-Endoperoxide Synthase 2 (Prostaglandin G/H Synthase And Cyclooxygenase)                 | NM_000963    | 1.88             | 159.1 | 36.15 | 1.8E-09 | 0    |
| SERPINE2   | Serpin Peptidase Inhibitor, Clade E (Nexin, Plasminogen Activator Inhibitor Type 1), Member 2         | NM_001136528 | 1.87             | 22.0  | 12.5  | 4.1E-04 | 0.06 |
| ACTN1      | Actinin, Alpha 1                                                                                      | NM_001130004 | 1.75             | 19.5  | 17.67 | 2.6E-05 | 0.01 |
| RIPK4      | Receptor-Interacting Serine-Threonine Kinase 4                                                        | NM_020639    | 1.75             | 44.4  | 15.08 | 1.0E-04 | 0.02 |
| PPP1R1A    | Protein Phosphatase 1, Regulatory (Inhibitor) Subunit 1A                                              | NM_006741    | 1.74             | 192.8 | 18.76 | 1.5E-05 | 0.01 |
| TTG9       | Tetrapeptide Repeat Domain 9                                                                          | NM_015351    | 1.74             | 7.8   | 11.04 | 8.9E-04 | 0.09 |
| AHNAK      | AHNAK Nucleoprotein                                                                                   | NM_001620    | 1.74             | 27.1  | 10.64 | 1.1E-03 | 0.1  |
| RAI14      | Retinoic Acid Induced 14                                                                              | NM_001145525 | 1.69             | 32.1  | 20.17 | 7.1E-06 | 0    |
| MCOLN3     | Mucolipin 3                                                                                           | NM_018298    | 1.68             | 17.8  | 11.93 | 5.5E-04 | 0.07 |
| GNAL       | Guanine Nucleotide Binding Protein (G Protein), Alpha Activating Activity Polypeptide, Olfactory Type | NM_002071    | 1.67             | 14.2  | 14.95 | 1.1E-04 | 0.02 |
| AK5        | Adenylate Kinase 5                                                                                    | NM_012093    | 1.62             | 7.7   | 11.4  | 7.3E-04 | 0.08 |
| SEL1L3     | Sel-1 Suppressor Of Lin-12-Like 3 (C. Elegans)                                                        | NM_015187    | 1.61             | 7.8   | 13.52 | 2.4E-04 | 0.04 |
| VWA5B2     | Von Willebrand Factor A Domain Containing 5B2                                                         | NM_138345    | 1.59             | 18.5  | 11.87 | 5.7E-04 | 0.07 |
| ZFP36      | ZFP36 Ring Finger Protein                                                                             | NM_003407    | 1.56             | 25.7  | 27.73 | 1.4E-07 | 0    |
| S100A11    | S100 Calcium Binding Protein A11                                                                      | NM_005620    | 1.52             | 17.1  | 11.72 | 6.2E-04 | 0.08 |
| NFATC2     | Nuclear Factor Of Activated T-Cells, Cytoplasmic, Calcineurin-Dependent 2                             | NM_001136021 | 1.49             | 23.9  | 12.7  | 3.7E-04 | 0.06 |
| CREB5      | CAMP Responsive Element Binding Protein 5                                                             | NM_004904    | 1.4              | 160.1 | 25.29 | 4.9E-07 | 0    |
| SLC7A14    | Solute Carrier Family 7, Member 14                                                                    | NM_020949    | 1.4              | 69.5  | 11.36 | 7.5E-04 | 0.09 |
| EPB41L1    | Erythrocyte Membrane Protein Band 4.1-Like 1                                                          | NM_012156    | 1.39             | 64.2  | 12.24 | 4.7E-04 | 0.07 |
| HMGCS1     | 3-Hydroxy-3-Methylglutaryl-CoA Synthase 1 (Soluble)                                                   | NM_002130    | 1.38             | 76.9  | 20.16 | 7.1E-06 | 0    |
| IER3       | Immediate Early Response 3                                                                            | NM_003897    | 1.38             | 165.1 | 19.06 | 1.3E-05 | 0.01 |
| PGM2L1     | Phosphoglucomutase 2-Like 1                                                                           | NM_173582    | 1.38             | 47.5  | 11.15 | 8.4E-04 | 0.09 |
| AKAP13     | A Kinase (PRKA) Anchor Protein 13                                                                     | NM_007200    | 1.36             | 124.3 | 22.04 | 2.7E-06 | 0    |
| VMP1       | Vacuole Membrane Protein 1                                                                            | NM_030938    | 1.34             | 108.3 | 22.39 | 2.2E-06 | 0    |

**Supplementary Figure 8 - Genes with significantly enriched expression in CD9+  $\beta$  cells.** Transcripts with significantly ( $FDR \leq 0.1$ ,  $p \leq 0.001$ ) elevated expression in CD9+  $\beta$  cells compared to CD9-  $\beta$  cells and a fold change of at least 1.33x were identified. (a) Relationship networks between these genes predicted by STRING. (b) The list of 47 genes meeting these criteria; 23 genes were omitted due to low expression level or high probability of association with a contaminating population.



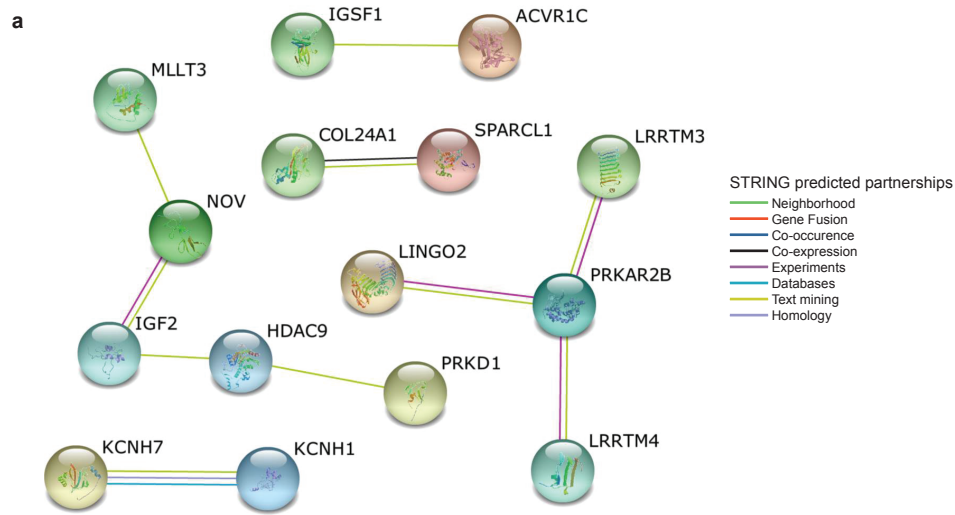

**b Genes significantly enriched in CD9- beta cells (vs. CD9+)**

| Gene    | Transcript                                                                                     | FC (CD9+ / CD9-) | CPM   | LR    | p value | FDR  |
|---------|------------------------------------------------------------------------------------------------|------------------|-------|-------|---------|------|
| SATB1   | SATB Homeobox 1                                                                                | -1.33            | 60.4  | 20.69 | 5.4E-06 | 0    |
| KCNMB2  | Potassium Channel Subfamily M Regulatory Beta Subunit 2                                        | -1.33            | 81.0  | 18.66 | 1.6E-05 | 0.01 |
| MBNL3   | Muscleblind-Like Splicing Regulator 3                                                          | -1.34            | 77.8  | 25.26 | 5.0E-07 | 0    |
| SOX5    | SRY (Sex Determining Region Y)-Box 5                                                           | -1.34            | 23.9  | 12.78 | 3.5E-04 | 0.05 |
| PTPN13  | Protein Tyrosine Phosphatase, Non-Receptor Type 13 (APO-1/CD95 (Fas)-Associated Phosphatase)   | -1.35            | 70.8  | 19.27 | 1.1E-05 | 0    |
| FKBP5   | FK506 Binding Protein 5                                                                        | -1.35            | 153.5 | 17.52 | 2.9E-05 | 0.01 |
| HDAC9   | Histone Deacetylase 9                                                                          | -1.35            | 112.2 | 16.24 | 5.6E-05 | 0.02 |
| LSAMP   | Limbic System-Associated Membrane Protein                                                      | -1.35            | 86.4  | 14.44 | 1.5E-04 | 0.03 |
| PCDH7   | Protocadherin 7                                                                                | -1.35            | 67.5  | 12.08 | 5.1E-04 | 0.07 |
| IGF2    | Insulin-Like Growth Factor 2                                                                   | -1.35            | 112.0 | 11.7  | 6.3E-04 | 0.08 |
| CPEB2   | Cytoplasmic Polyadenylation Element Binding Protein 2                                          | -1.36            | 42.2  | 11.16 | 8.4E-04 | 0.09 |
| NOV     | Nephroblastoma Overexpressed                                                                   | -1.37            | 35.0  | 13.82 | 2.0E-04 | 0.04 |
| METAP1  | Methionyl Aminopeptidase 1                                                                     | -1.38            | 27.9  | 13.22 | 2.8E-04 | 0.05 |
| ARL4C   | ADP-Ribosylation Factor-Like 4C                                                                | -1.38            | 109.4 | 13.17 | 2.9E-04 | 0.05 |
| CDK8    | Cyclin-Dependent Kinase 8                                                                      | -1.41            | 29.5  | 15    | 1.1E-04 | 0.02 |
| CHL1    | Cell Adhesion Molecule L1-Like                                                                 | -1.42            | 54.7  | 16.49 | 4.9E-05 | 0.01 |
| IGSF1   | Immunoglobulin Superfamily, Member 1                                                           | -1.42            | 24.7  | 15.78 | 7.1E-05 | 0.02 |
| MLLT3   | Myeloid/Lymphoid Or Mixed-Lineage Leukemia (Trithorax Homolog, Drosophila); Translocated To, 3 | -1.42            | 17.8  | 11.02 | 9.0E-04 | 0.09 |
| SLC8A1  | Solute Carrier Family 8 (Sodium/Calcium Exchanger), Member 1                                   | -1.43            | 156.8 | 19.58 | 9.7E-06 | 0    |
| PLK2    | Polo-Like Kinase 2                                                                             | -1.44            | 42.2  | 16.68 | 4.4E-05 | 0.01 |
| SEMA6A  | Sema Domain, Transmembrane Domain (TM), And Cytoplasmic Domain, (Semaphorin) 6A                | -1.46            | 133.8 | 23.25 | 1.4E-06 | 0    |
| CNKSR2  | Connector Enhancer Of Kinase Suppressor Of Ras 2                                               | -1.49            | 31.3  | 16.34 | 5.3E-05 | 0.01 |
| ACVR1C  | Activin A Receptor, Type IC                                                                    | -1.5             | 39.6  | 12.14 | 4.9E-04 | 0.07 |
| MAF1    | MAF1 Homolog (S. Cerevisiae)                                                                   | -1.51            | 19.6  | 10.63 | 1.1E-03 | 0.1  |
| ASXL2   | Additional Sex Combs Like Transcriptional Regulator 2                                          | -1.53            | 42.7  | 21.29 | 4.0E-06 | 0    |
| LINGO2  | Leucine Rich Repeat And Ig Domain Containing 2                                                 | -1.53            | 24.7  | 10.65 | 1.1E-03 | 0.1  |
| SIM1    | Single-Minded Family BHLH Transcription Factor 1                                               | -1.54            | 13.8  | 17.33 | 3.1E-05 | 0.01 |
| TAGLN3  | Transgelin 3                                                                                   | -1.54            | 42.4  | 13.51 | 2.4E-04 | 0.04 |
| PRKAR2B | Protein Kinase, CAMP-Dependent, Regulatory, Type II, Beta                                      | -1.55            | 24.2  | 20.35 | 6.5E-06 | 0    |
| ASB9    | Ankyrin Repeat And SOCS Box Containing 9                                                       | -1.55            | 44.7  | 16.15 | 5.9E-05 | 0.02 |
| WASF1   | WAS Protein Family, Member 1                                                                   | -1.55            | 19.9  | 14.81 | 1.2E-04 | 0.03 |
| TSPAN1  | Tetraspanin 1                                                                                  | -1.56            | 27.4  | 24.51 | 7.4E-07 | 0    |
| AMPH    | Amphiphysin                                                                                    | -1.56            | 32.9  | 11.63 | 6.5E-04 | 0.08 |
| LRRTM3  | Leucine Rich Repeat Transmembrane Neuronal 3                                                   | -1.58            | 48.7  | 25.24 | 5.1E-07 | 0    |
| SPATA18 | Spermatogenesis Associated 18                                                                  | -1.58            | 17.8  | 11.96 | 5.4E-04 | 0.07 |
| NAV3    | Neuron Navigator 3                                                                             | -1.59            | 18.3  | 18.42 | 1.8E-05 | 0.01 |
| KCNH7   | Potassium Channel, Voltage Gated Eag Related Subfamily H, Member 7                             | -1.6             | 21.6  | 20.12 | 7.3E-06 | 0    |
| KCNH1   | Potassium Channel, Voltage Gated Eag Related Subfamily H, Member 1                             | -1.6             | 21.7  | 12.87 | 3.3E-04 | 0.05 |
| ADAMTS5 | ADAM Metalloproteinase With Thrombospondin Type 1 Motif, 5                                     | -1.65            | 16.1  | 14.56 | 1.4E-04 | 0.03 |
| RALYL   | RALY RNA Binding Protein-Like                                                                  | -1.68            | 8.9   | 10.88 | 9.7E-04 | 0.1  |
| MDFC    | MyoD Family Inhibitor Domain Containing                                                        | -1.73            | 20.6  | 23.37 | 1.3E-06 | 0    |
| SPARCL1 | SPARC-Like 1 (Hevin)                                                                           | -1.77            | 10.9  | 11.18 | 8.3E-04 | 0.09 |
| STARD9  | StAR-Related Lipid Transfer (START) Domain Containing 9                                        | -1.84            | 9.6   | 12.05 | 5.2E-04 | 0.07 |
| DGKB    | Diacylglycerol Kinase, Beta 90kDa                                                              | -1.99            | 27.8  | 22.66 | 1.9E-06 | 0    |
| STMN2   | Stathmin 2                                                                                     | -2.02            | 132.4 | 44.29 | 2.8E-11 | 0    |
| KLHL1   | Kelch-Like Family Member 1                                                                     | -2.1             | 6.3   | 11.2  | 8.2E-04 | 0.09 |
| CLVS1   | Clavesin 1                                                                                     | -2.14            | 4.9   | 18.21 | 2.0E-05 | 0.01 |
| CNTN5   | Contactin 5                                                                                    | -2.18            | 14.5  | 18.76 | 1.5E-05 | 0.01 |
| LRRTM4  | Leucine Rich Repeat Transmembrane Neuronal 4                                                   | -2.24            | 10.5  | 36.3  | 1.7E-09 | 0    |
| THSD7A  | Thrombospondin, Type I, Domain Containing 7A                                                   | -2.3             | 58.2  | 25.5  | 4.4E-07 | 0    |
| NELL2   | NEL-Like 2 (Chicken)                                                                           | -2.52            | 7.2   | 15.09 | 1.0E-04 | 0.02 |
| CDH18   | Cadherin 18, Type 2                                                                            | -2.56            | 28.6  | 21.66 | 3.3E-06 | 0    |
| GRIP1   | Glutamate Receptor Interacting Protein 1                                                       | -2.98            | 5.3   | 20.44 | 6.2E-06 | 0    |
| NPY     | Neuropeptide Y                                                                                 | -3.08            | 212.3 | 36.49 | 1.5E-09 | 0    |
| CCDC81  | Coiled-Coil Domain Containing 81                                                               | -3.17            | 2.5   | 14.37 | 1.5E-04 | 0.03 |
| B3GALT1 | UDP-Gal:BetaGlcNAc Beta 1,3-Galactosyltransferase, Polypeptide 1                               | -3.2             | 2.3   | 13.11 | 2.9E-04 | 0.05 |
| ITM2A   | Integral Membrane Protein 2A                                                                   | -3.47            | 3.4   | 14.73 | 1.2E-04 | 0.03 |
| PRKD1   | Protein Kinase D1                                                                              | -3.53            | 4.8   | 11.25 | 8.0E-04 | 0.09 |
| ZNF804A | Zinc Finger Protein 804A                                                                       | -3.6             | 1.8   | 11.23 | 8.1E-04 | 0.09 |
| PTPRD   | Protein Tyrosine Phosphatase, Receptor Type, D                                                 | -3.75            | 17.9  | 54.25 | 1.8E-13 | 0    |
| COL24A1 | Collagen, Type XXIV, Alpha 1                                                                   | -4.39            | 2.4   | 26.43 | 2.7E-07 | 0    |

**Supplementary Figure 9 – Genes with significantly enriched expression in CD9-  $\beta$  cells.** Transcripts with significantly ( $FDR < 0.1$ ,  $p < 0.001$ ) elevated expression in CD9-  $\beta$  cells compared to CD9+  $\beta$  cells and a fold change of at least 1.33x were identified. (a) Relationship networks between these genes predicted by STRING. (b) The list of 60 genes meeting these criteria; 15 genes were omitted due to low expression level or high probability of association with a contaminating population.

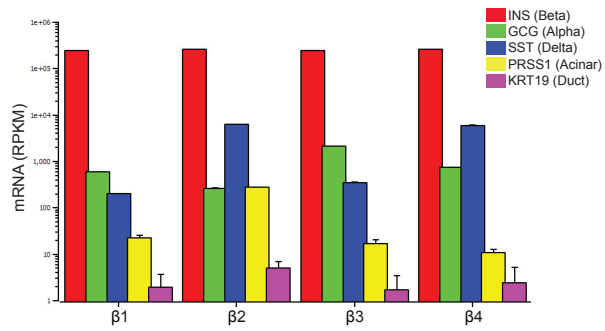

**Supplementary Figure 10 – Analysis of  $\beta$  cell population purity.**

Normalized RNA-seq values (Reads Per Kilobase per Million; RPKM) for genes associated with cell-type specific gene expression are indicated. Exocrine cell contamination, indicated by PRSS1 and KRT19 expression, was <0.1% in each population. As indicated by detection of somatostatin and glucagon tags, the principal contaminants in each population were either delta cells (2.4% in  $\beta 2$ , 2.3% in  $\beta 4$ ) or alpha cells (0.2% in  $\beta 1$ , 0.8% in  $\beta 3$ ).

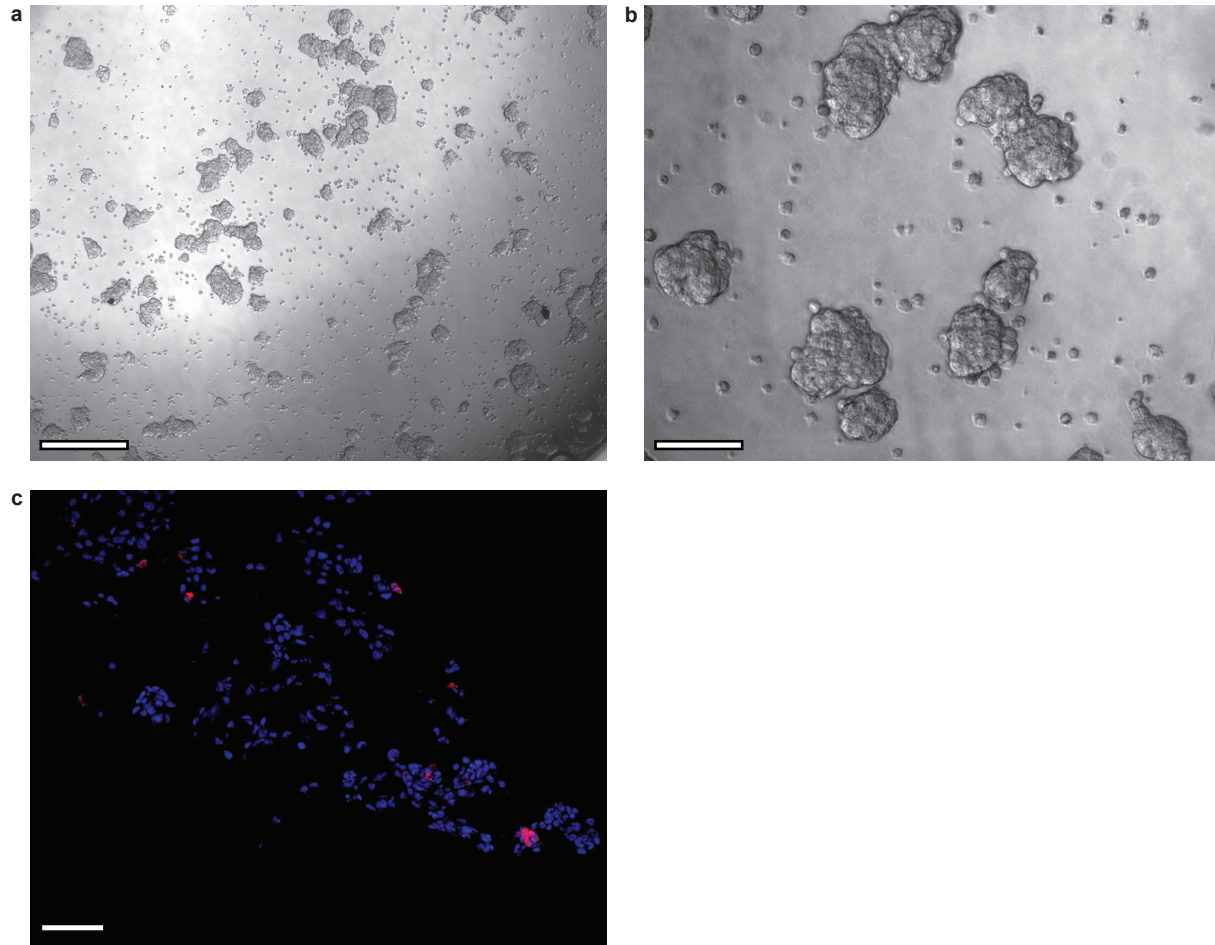

**Supplementary Figure 11 – Reaggregation of FACS-sorted  $\beta$  cells to restore function.** Overnight suspension culture of  $\beta$  cells with mouse endothelial cell line MS1 at a 1:10 ratio produces spheroid aggregates (a) 40x magnification of bright field image of aggregates in culture (b) 100x magnification; (c) Proinsulin positive cells are associated with or incorporated in clusters of negative (MS1) cells (100x magnification, 5 $\mu$ m cryosections, nuclei visualized with Hoechst 33342). Scale bars: 500  $\mu$ m (a), 100  $\mu$ m (b,c).
