# Supplementary material for: Human islets contain four distinct subtypes of β cells
Source: PubMed Central journal article supplement (PMC4942571; doi:10.1038/ncomms11756), 2016-07-11
Supplement: ncomms11756-s2.pdf [file ncomms11756-s2.pdf]

**Editorial Note:** This manuscript has been previously reviewed at another journal that is not operating a transparent peer review scheme. It was accepted without further rounds of review at Nature Communications
